# 1 Accurate and Rapid Molecular Subgrouping of High-Grade Glioma via Deep-learning-assisted Label-free 2 Fiberoptic Raman Spectroscopy

3 Chang Liu<sup>1, #</sup>, Jiejun Wang<sup>2, #</sup>, Jianghao Shen<sup>1</sup>, Xun Chen<sup>1,3, \*</sup>, Nan Ji<sup>2, \*</sup>, Shuhua Yue<sup>1, \*</sup>

4  
5 <sup>1</sup>Key Laboratory of Biomechanics and Mechanobiology (Beihang University), Ministry of Education, Institute  
6 of Medical Photonics, Beijing Advanced Innovation Center for Biomedical Engineering, School of Biological  
7 Science and Medical Engineering, Beihang University, Beijing 100191, China

8 <sup>2</sup>Department of Neurosurgery, Beijing Tiantan Hospital, Capital Medical University, Beijing 100050, China

9 <sup>3</sup>School of Engineering Medicine, Beihang University, Beijing 100191, China

10  
11 #These authors contributed equally

12 \*Corresponding authors, [chenxun2007@buaa.edu.cn](mailto:chenxun2007@buaa.edu.cn) (X.C.); [jinan@mail.ccmu.edu.cn](mailto:jinan@mail.ccmu.edu.cn) (N.J.);  
13 [yue\\_shuhua@buaa.edu.cn](mailto:yue_shuhua@buaa.edu.cn) (S.Y.)

## 14 15 Abstract

16 Glioma are often impossible to visualize discrimination within different grades and staging, especially for  
17 glioma molecular subgrouping which is highly related with surgery strategy and prognosis. Based on glioma  
18 guideline published on 2021, molecular subgroups such as IDH, 1p/19q etc. need to be detected to classify  
19 the subgroups (astrocytoma, oligodendroglioma, GBM) from high-grade glioma and guide the personalized  
20 treatment. However, timely intraoperative technology is limited to identify molecular subgroups of glioma  
21 tissues. To address this problem, we develop a deep learning-guided fiberoptic Raman diagnostic platform to  
22 assess its ability of real-time high-grade glioma molecular subgrouping. The robust Raman diagnostic  
23 platform is established using convolutional neural networks (ResNet) together with fingerprint spectra  
24 acquired within 3 seconds. We have acquired a total of 2358 Raman spectra from 743 tissue sites  
25 (astrocytoma: 151; oligodendroglioma:150; GBM: 442) of 44 high-grade glioma patients (anaplastic  
26 astrocytoma: 7; anaplastic oligodendroglioma:8; GBM: 29). The optimized ResNet model provides an overall  
27 mean diagnostic accuracy of 84.1% (sensitivity of 87.1% and specificity of 81.5%) for identifying 7 molecular  
28 subgroups (e.g., IDH, 1p/19q, MGMT, TERT, EGFR, Chromosome 7/10, CDKN2A/B) of high-grade glioma,  
29 which is superior to the best diagnosis performance using PCA-SVM and UMAP. We further investigate the  
30 saliency map of the best ResNet models using the correctly predicted Raman spectra. The specific Raman  
31 features that are related to the tumor-associated biomolecules (e.g., collagens, and lipids) validate the  
32 robustness of ResNet diagnostic model. This potential intraoperative technology may therefore be able to  
33 diagnosis molecular subgroups of high-grade glioma in real time, making it an ideal guide for surgical  
34 resection and instant post-operative decision-making.

## 35 36 Introduction

37 High-grade gliomas are the most common and aggressive primary tumors of the central nervous system<sup>1</sup>.  
38 The molecular genetic stratification of gliomas is important as more evidence emerges of the predictive and  
39 prognostic implications of different genetic subgroups<sup>2</sup>. As a major treatment, gross total resection is  
40 demonstrated to improve patient's progression-free and overall survival. Moreover, molecular subgrouping  
41 techniques, which can provide predictive and prognostic information, are introduced into the surgical  
42 workflow. This approach would allow the surgeon to optimized their extent of surgical resection for different  
43 gene profiles<sup>3-5</sup>.

44  
45 Based on the latest glioma grading guideline of World Health Organization (WHO) published on June 2021  
46 at the time of writing<sup>6</sup>, high-grade glioma include three subgroups, including grade 3 to 4 astrocytoma, grade  
47 3 oligodendroglioma, and grade 4 glioblastoma (GBM). Based on the histological glioma type and molecular  
48 subgroups together (e.g. IDH, 1p/19q, MGMT, TERT, EGFR, Chromosome7/10, CDKN2A/B), high-grade  
49 glioma could be classified into three types. For instance, GBMs, which are considered to be with high  
50 malignancy and poor prognosis, are discriminated from the other two high-grade glioma subgroup by IDH  
51 wild subgrouping with histological GBM type<sup>7</sup>. Glioma without histological features is also diagnosed to be  
52 GBM with IDH wild and either EGFR amplification, TERT mutation or chromosome copynumber +7/-10  
53 (combined entire chromosome 7 gain/ entire chromosome 10 loss)<sup>6</sup>. Oligodendroglioma is currently defined  
54 on histological feature with 1p/19q codeletion, and IDH mutation<sup>8</sup>. Astrocytoma is defined on histological  
55 feature with 1p/19q intact, and IDH wild<sup>9</sup>. Patients with 1p/19q codeletion have better prognosis and are  
56 sensitive to chemotherapy and radiotherapy.

57  
58 The current gold standard of the molecular subgrouping is immunohistochemistry (IHC), cytogenetic testing  
59 and next-generation sequencing<sup>10-12</sup>. However, next-generation sequencing is complex and time-consuming  
60 (1-2 weeks), which cannot provide molecular subgroups during surgery. To detect above molecular  
61 subgroups noninvasively, rapidly, and accurately, magnetic resonance imaging (MRI) shows the potential  
62 incorporating with machine learning algorithms. MRI diagnosed IDH subgrouping with an AUC of 0.888<sup>13</sup>,  
63 1p/19q with an AUC of 0.811<sup>14</sup>, and MGMT subgrouping with an AUC of 0.898<sup>15</sup>. However, molecular

1 subgroups (TERT, EGFR, Chromosome 7/10, and CDKN2A/B) have not been detected by MRI<sup>16,17</sup>. There is  
2 an urgent clinical need for comprehensive simultaneous detection of multiple molecular types. MRI also  
3 cannot uncover the rational biological explanation about IDH, 1p/19q, MGMT etc. subgroups simultaneously  
4 with robust diagnostic accuracy<sup>18</sup>. Therefore, rapid and non-destructive methods with higher molecular  
5 selectivity are required.

6  
7 Raman spectroscopy is a label-free optical vibrational spectroscopy technique, which can investigate specific  
8 biomolecular compositions of tissues, and has been explored for diagnosis of multiple human cancers<sup>19–26</sup>.  
9 Previous studies demonstrated that Raman spectroscopy enables intraoperative brain cancer detection in  
10 humans<sup>27,28</sup>. Leblond et al. discriminated dense cancer from normal brain with a sensitivity of 93% and a  
11 specificity of 91%<sup>19</sup>. Galli et al. achieved to classify oligodendroglioma, astrocytoma and GBM with correct  
12 rates of 94%, 86% and 90%<sup>29</sup>. However, IDH1-mutant, and 1p/19q codeletion, were discerned only with a  
13 correct rate of 81%. Uckermann et al. classified IDH1 mutation with a correct rate of 89%<sup>30</sup>. Sciortino et al.  
14 studied the Raman spectral difference between IDH wild and mutation, which achieves an accuracy of  
15 87%<sup>31</sup>. Livermore et al. also improved IDH subgrouping with the sensitivity and specificity of 91% and 95%<sup>32</sup>.  
16 However, other subgroups (TERT, EGFR, Chromosome 7/10, CDKN2/B) have not been investigated using  
17 the Raman biopsy technologies. Hollon et al. developed an artificial-intelligence-based molecular  
18 classification (IDH, 1p/19q and ATRX) of diffuse gliomas with the accuracy of  $93.3 \pm 1.6\%$  using stimulated  
19 Raman histology (SRH)<sup>33</sup>. However, this approach scanning overall tissue (>1 cm) will cost too much time  
20 (>1 hour).

21  
22 To fulfil the unmet clinical need, here we develop a molecular-specific convolutional neural network (ResNet)  
23 model together with fiberoptic Raman spectroscopy to achieve real-time and accurate diagnosis of molecular  
24 subgroups in high-grade glioma. We have acquired a total of 2358 Raman spectra from 743 tissue sites  
25 (astrocytoma: 151; oligodendroglioma: 150; GBM: 442) of 44 high-grade glioma patients (astrocytoma: 7;  
26 oligodendroglioma: 8; GBM: 29). Our spectral ResNet model provides an overall mean diagnostic accuracy of  
27 84.1% (sensitivity of 87.1% and specificity of 81.5%) for identifying 7 molecular (IDH, 1p/19q, MGMT, TERT,  
28 EGFR, Chromosome 7/10, and CDKN2A/B) subgroups of high-grade glioma simultaneously. The AUCs of all  
29 the molecular subgrouping were larger than 0.8, and the AUCs of IDH, 1p/19q and CDKN were larger than  
30 0.9. The accuracy together with the sensitivity and specificity of the model was calculated using an external  
31 testing dataset from extra samples, which avoids spectra from the same samples for train and test set. The  
32 fingerprint spectra acquisition for each tissue site is within 3 seconds, and the diagnostic time-cost for 7  
33 molecular subgrouping simultaneously using ResNet is 4 ms per spectra. The diagnostic performance of the  
34 deep learning model (ResNet) was then compared to that of the machine learning model (PCA-SVM) and  
35 manifold learning model (UMAP). We further investigated the saliency map with the ResNet to reveal the key  
36 biomolecular features for molecular subgrouping of high-grade glioma. It was found that the molecular  
37 weights of lipid and collagen in saliency map were relatively higher for high-grade glioma subgrouping.  
38 Together, the Raman technology could be integrated into the neurosurgical workflow for rapid and accurate  
39 identification of glioma molecular subgrouping with sensitivity beyond current capabilities.

## 40 41 **Results**

42 **Workflow of high-grade glioma molecular subgrouping.** As shown in **Figure 1**, the workflow of high-  
43 grade glioma and GBM molecular subgrouping by Raman spectroscopy was described. Based on 2021  
44 WHO glioma classification guideline, we focus on 7 typical molecular subgroups (IDH, 1p/19q, MGMT,  
45 TERT, EGFR, Chromosome 7/10, CDKN2A/2B) of high-grade glioma. First, IDH and 1p/19q subgroups were  
46 identified to classify GBM from high-grade glioma. Then, molecular subgroups (MGMT methylation, TERT  
47 wildtype, EGFR amplification, CDKN homozygous deletion, Chromosome +7/-10) were identified in both  
48 high-grade glioma and GBM.

49 As shown in **Figure 2a**, the workflow of deep-learning based Raman data classification and explanation  
50 analysis for high-grade glioma molecular subgrouping diagnosis was described. First, Raman spectra were  
51 acquired using fiberoptic Raman spectroscopy (**Supplementary Figure S1**) with 5 second for each tissue  
52 site (the details were described in the Method section). Second, the spectra have been preprocessed for  
53 auto-fluorescent removal, denoising, and min-max normalization. Third, for each molecular subgroup, the  
54 Raman data of the tissues was split into three datasets (80% for training, 10% for validation and 10% for  
55 test) for deep learning.

56 To avoid overfitting, the models were trained and validated during learning iteration. The prediction  
57 performance of the test set works as the final results of built subgrouping models. For model comparison,  
58 the same training sets were also put into the PCA-SVM and UMAP models for 10-fold cross-validation. To  
59 compare the performance between deep-learning and other models, the confusion matrix and the receiver  
60 operating characteristic (ROC) curve of each model were evaluated in the test set, as shown in **Figure 2a**.

1 Finally, in **Figure 2b**, we evaluated the significant biomolecular information used for diagnosis by saliency  
2 maps which indicate the contribution of different Raman wavenumber. The saliency maps were generated by  
3 difference spectrum and binary stochastic filtering (BSF)<sup>34</sup>. The detail of BSF restrained schematic is  
4 described in the method.

5  
6 **Raman spectroscopy analysis of glioma tissues.** Using our fiberoptic Raman spectroscopy, we acquired  
7 Raman data from 743 tissue sites of 44 high-grade glioma patients. **Figure 3** shows mean spectra from high-  
8 grade glioma patients with standard deviation. The spectra have been preprocessed with iterative multi-  
9 polynomial fitting, s-g filter and min-max normalization. Distinct tissue Raman peaks can be observed from  
10 all glioma (**Figure 3**) in the fingerprint region. For each molecular subgroup, difference spectrum was  
11 calculated by vector subtraction between mean spectra from positive and negative patients. In summary,  
12 spectra obtained are dominated by the CH<sub>2</sub> scissoring deformations at 1440cm<sup>-1</sup>, near which the spectral  
13 difference is persistently observed. Peak of the bond are shifted in different molecular subgroups. Also  
14 pronounced are C=O stretching of protein backbone at 1661 cm<sup>-1</sup>, which is often referred to as amid I band.  
15 Amide III band between 1200 and 1380cm<sup>-1</sup> is related to C-H and N-C bending deformations. The difference  
16 in Amide I and III bands is significant in 1p/19q (b), MGMT (c), TERT (d) and EGFR (e). Significant  
17 difference can also be observed near collagen bands at 854 and 938 cm<sup>-1</sup> and lipid related signal from 492 to  
18 604 cm<sup>-1</sup>.

19 **Accurate and rapid glioma molecular subgrouping with deep learning.** The models are first trained and  
20 optimized with both training dataset and validation dataset. Then the performance of each model is  
21 evaluated in the test dataset. **Figure 4** shows the ROCs of molecular identification from high-grade glioma.  
22 The AUCs of deep learning (ResNet) are larger than 0.95 in IDH, 1p/19q and CDKN2A/B. The AUCs in other  
23 subgroups also exceed 0.8, revealing the potential of Raman based subgrouping. In comparisons, **Figure 5**  
24 respectively show the sensitivity, specificity accuracy and AUC for high-grade glioma subgrouping. For the  
25 most two previously investigated subgroups (IDH and 1p19q), our deep learning models (Resnet) achieve  
26 overall diagnostic accuracies of 90.67% (sensitivity of 93.75% and specificity of 88.37%) and 86.67%  
27 (sensitivity of 90.00% and specificity of 85.45%) in the **table S2**.

28 **Supplementary Figure S3-S6** compares the performance (sensitivity, specificity, accuracy and AUC)  
29 between machine learning (SVM), manifold learning (UMAP), and deep learning (ResNet), indicating that  
30 deep learning is a more practical algorithm in most subgroups. Comparing with PCA-SVM and UMAP in the  
31 **table S2**, ResNet was better for discriminating IDH mutation and 1p19q codeletion. Using ResNet also  
32 achieves better overall diagnostic accuracy in most of the other subgroups (82.67% in EGFR, 78.67% in  
33 Chromosome7/10 and 89.33% in CDKN2A/B). It is exceptional that in MGMT and TERT, using ResNet  
34 achieves lower diagnostic accuracy (88.00% in MGMT and 81.33% in TERT) than manifold learning (91.28%  
35 in MGMT and 87.92% in TERT).

36 **GBM molecular subgrouping with deep learning.** To further demonstrate the effectiveness of our  
37 classification models, performance in GBM 5 molecular subgroups is also evaluated. In 422 tissue sites of 29  
38 high-grade glioma patients, the Raman spectra are preprocessed, split and fed into the models in the same  
39 way. **Figure 6** shows the performance of subgrouping. With our deep learning model, the AUCs in all  
40 subgroups are larger than 0.85. The diagnostic accuracy in each subgroup is also better than 0.86 (over 0.9  
41 in MGMT, TERT and CDKN2A/B), demonstrating our ResNet to be a practical algorithm for subgrouping.

42 **Raman features related to high-grade glioma molecular subgrouping.** To further investigate the  
43 significant biomolecular information identified in tissue Raman spectra during the glioma molecular diagnosis  
44 process of ResNet. Raw spectral region of interest (ROI) between molecular subgrouping, and ResNet  
45 determined spectral ROI which are most contributed to the diagnostic models are selected using the saliency  
46 maps, as shown in **Figure 7** and **table S3**. The Raman peaks related to the glioma tissues are recognized,  
47 reflecting the most significant biomolecular variance in Raman diagnosis based on the BSF method of  
48 ResNet. In IDH recognition, the saliency map was positive related to the Raman peaks of (499 cm<sup>-1</sup>, 568 cm<sup>-1</sup>,  
49 577 cm<sup>-1</sup> (phosphatidylinositol), 1078 cm<sup>-1</sup> (lipid, phospholipid, nucleic acid), 1473 cm<sup>-1</sup>), negative related to  
50 the Raman peaks of (1448 cm<sup>-1</sup> (collagen), 1433 cm<sup>-1</sup> (lipid)). In 1p/19q recognition, the saliency map was  
51 positive related to the Raman peaks of (525 cm<sup>-1</sup> (serine, cysteine), 547 cm<sup>-1</sup> (cholesterol), 1085 cm<sup>-1</sup> (nuclei  
52 acid), 1094 cm<sup>-1</sup> (DNA)), negative related to the Raman peaks of (1319 cm<sup>-1</sup> (collagen), 1332 cm<sup>-1</sup> (CH<sub>3</sub>CH<sub>2</sub>  
53 wagging, collagen)). In MGMT recognition, the saliency map was positive related to the Raman peaks of  
54 (930 cm<sup>-1</sup> (collagen), 951 cm<sup>-1</sup> (protein), 1560 cm<sup>-1</sup> (tryptophan)), negative related to the Raman peaks of  
55 (640 cm<sup>-1</sup> (tyrosine), 1442 cm<sup>-1</sup> (triglycerides)). In TERT recognition, the saliency map was positive related to  
56 the Raman peaks of (529 cm<sup>-1</sup>), negative related to the Raman peaks of (508 cm<sup>-1</sup>, 525 cm<sup>-1</sup>, 536 cm<sup>-1</sup>  
57 (cholesteryl esters), 540 cm<sup>-1</sup> (cysteine)). In EGFR recognition, the saliency map was positive related to the  
58 Raman peaks of (1000 cm<sup>-1</sup> (phenylalanine, collagen), 1221 cm<sup>-1</sup> (protein)) negative related to the Raman  
59 peaks of (549 cm<sup>-1</sup> (cholesterol), 850 cm<sup>-1</sup> (tyrosine), 856 cm<sup>-1</sup> (type I collagen)).

1 In Chromosome copy number +7/-10 recognition, the saliency map was positive related to the Raman peaks  
2 of (1129  $\text{cm}^{-1}$  (protein, lipid), 1155  $\text{cm}^{-1}$  (protein, glycogen)), negative related to the Raman peaks of (818  $\text{cm}^{-1}$   
3  $\text{cm}^{-1}$  (collagen), 1068  $\text{cm}^{-1}$ (collagen, fatty acid, palmitic acid)). In CDKN2A/B recognition, the saliency map was  
4 positive related to the Raman peaks of (1169  $\text{cm}^{-1}$  (type I collagen)), negative related to the Raman peaks of  
5 (1064  $\text{cm}^{-1}$  (lipid), 1618  $\text{cm}^{-1}$  (tryptophan), 1635  $\text{cm}^{-1}$  (collagen)). The ResNet model recognized the relative  
6 intensity changes (either an increase or decrease) of multiple Raman bands related to biomolecules in the  
7 Raman spectra of high-grade glioma.  
8

## 9 Discussion

10 Distinguishing the molecular subgroups in the surgery is significant as it devotes to identify the operation  
11 plan. In this work, we have developed and validated the Raman diagnostic platform of the unique ResNet  
12 model for real-time accurate identification of molecular subgroups of high-grade glioma and GBM patients.  
13 The ResNet model was optimized with *tanh* activation function instead of *relu* or *linear* function. Nonlinear  
14 activation function achieves better fitting to many different spectroscopic patterns with better accuracy and  
15 less loss during training networks. The overall process including Raman spectra acquisition and model  
16 detection for single tissue site cost within 5 seconds. In AUC comparisons, ResNet was better for diagnosis  
17 than PCA-SVM and UMAP. All molecular subgrouping of high-grade glioma differentiates with the AUC of >  
18 0.8 by using ResNet, especially IDH wild and mutation, 1p/19q intact and codeletion, CDKN2B depletion and  
19 no depletion differentiate with the AUC of >0.95. We also investigated GBM subgrouping to evaluate our  
20 Raman ResNet model. For the same molecular signature, of GBM subgrouping is better than high-grade  
21 glioma subgrouping in AUC comparisons, as shown in **Figure 6**.  
22

23 For saliency map shown in **Figure 7**, the reduction of lipid and collagen reflects IDH wild. Cholesterol, serine,  
24 cysteine, and nuclei acid increase, reflecting 1p/19q intact. Tyrosine, protein classes, triglycerides,  
25 tryptophan and collagen change in glioma tissues, reflecting spectral difference between MGMT  
26 demethylation and methylation. Serine and cysteine decrease, reflecting TERT mutation. Cholesterol and  
27 tyrosine decrease, reflecting EGRF amplification. Collagen, lipid and porphyrin change, reflecting  
28 Chromosome7 amplification; proline, valine and phenylalanine change, reflecting Chromosome10 depletion.  
29 Phenylalanine and collagen change, reflecting CDKN2A depletion; tryptophan, lipid and collagen change,  
30 reflecting CDKN2B depletion. Previous studies have confirmed that the decline of lipids and collagen is  
31 closely related to IDH mutation. Mutated IDH subtyping would convert  $\alpha$ -ketoglutaric acid in the tricarboxylic  
32 acid cycle into 2-hydroxy-glutaric acid (2-HG), and the high level of 2-HG inhibits the synthesis of  
33 triglycerides and other lipids<sup>35</sup>, and the high level of D2-HG blocks the prolyl hydroxylation of collagen,  
34 leading to defective maturation of collagen<sup>36</sup>. For other molecular signatures, literatures haven't provided  
35 sufficient support.  
36

37 Molecular classification could also have an immediate impact on the surgical strategies of patients with high-  
38 grade glioma. Surgical goals should be tailored based on molecular subgroups<sup>37,38</sup>. Patients with molecular  
39 astrocytoma who undergo gross total resection achieve a 5-year increase in median survival compared to  
40 patients who receive subtotal resections. Our Raman molecular subgrouping creates an avenue for accurate  
41 and rapid differentiation of high-grade glioma subgroups to define a better prognosis. Moreover, fewer than  
42 10% of patients with glioma are enrolled in clinical trials<sup>39</sup>. Clinical trials limit inclusion criteria to a specific  
43 subpopulation, often defined by molecular subgroups. Our deep learning Raman method may offer a new  
44 opportunity for new clinical trials.  
45

46 Current multiple techniques were developed for intraoperative brain cancer. Modalities such as ultrasound  
47 (US) and optical coherence tomography (OCT), confocal fluorescence microscopy (CFM) have been shown  
48 to provide structural information (large scale for US, sub-micrometer resolution for CFM, and microscopic  
49 scale for CFM, OCT) in real time. Intraoperative US show the ability to margin deep seated brain tumors from  
50 normal brain<sup>40</sup>. Intraoperative OCT has been able to distinguish high-density/low-density cancer in nine  
51 patients with high-grade gliomas<sup>41</sup>. Intraoperative confocal microscopy has shown evidence for invasion  
52 detection using fluorescence in grade 1 to 2 glioma on 10 patients<sup>42</sup>. However, no evidence indicates these  
53 modalities could investigate molecular subgroups. Recently, SRH has shown the possibility of detecting  
54 three molecular signatures (IDH, 1P/19q and ATRX) through stimulated Raman modality<sup>33</sup>, However, in  
55 practice, Raman mapping for molecular subtyping is not necessary with time consuming. Molecular  
56 subgrouping is on patient level and has no heterogeneity, thus, detection of several sites is more suitable for  
57 clinical situation, meanwhile, overall site-detection method is more cost-effective on both devices and  
58 algorithm.  
59

60 This paper is a preliminary study confirmed that the feasibility of providing rapid molecular signature test to  
61 doctors during surgery. The influence of subdivided glioma categories on molecular feature recognition  
62 performance was discussed in this article, which can be applied in intraoperative scenarios to assist doctors

1 in identifying GBM combined with rapid freezing pathological results. Our deep learning fiberoptic Raman  
2 spectroscopy may improve the detection performance of molecular features such as MGMT methylation etc.  
3 By incorporating with molecular weight analysis, we found that potential related makers (e.g. lipid and  
4 protein, DNA and collagen) for high-grade glioma subgrouping. Although we don't implement in vivo  
5 molecular subgrouping detection, previous researches have shown the solid foundation of in vivo Raman  
6 spectroscopy<sup>43,44</sup>, indicating the feasibility of in vivo molecular subgrouping.

## 8 **Methods**

9 **Tissue preparation.** This study was approved by the ethical committee of Beijing Tiantan Hospital (KY2023-  
10 030-02). Before the operation, every patient underwent enhanced magnetic resonance imaging (MRI),  
11 including T1-weighted, T1-contrast, T2-weighted, and T2-Flair (T2-fluid-attenuated inversion recovery)  
12 modalities. Two experienced neuroradiologists independently reviewed the MRI data of patients, and those  
13 diagnosed with high-grade glioma (HGG) were considered for further analysis. During the operation, tumor  
14 tissues from patients diagnosed with HGG based on preoperative MRI were validated using rapid intra-  
15 operative tissue pathology. Only specimens showing tissue pathology consistent with the MRI images were  
16 collected. After the tumor tissue was resected, a sodium chloride solution was used to remove blood  
17 adhered to the tumor tissue. The original tumor tissue was then cut into several small tissue particles  
18 (approximately 2mm\*2mm\*2mm). Then the tumor samples were snap-frozen in liquid nitrogen and stored at  
19 -80 °C. All procedures were completed within 30 minutes. The tissues were sectioned and stained with  
20 hematoxylin-eosin (H&E) to confirm the pathological diagnosis of each sample. Finally, the tissues prepared  
21 on aluminum foil were used for Raman spectroscopic studies.

22  
23 **Fiberoptic Raman spectroscopy.** The Raman probe spectroscopy system as shown in **Supplementary**  
24 **Figure S1** which we used for high-grade glioma and GBM diagnosis, which is composed of Raman probe  
25 with filters (RamanProbe, Inphotonics Inc.), 785nm laser (o8NLDM, Cobolt Inc.) and high-sensitive  
26 spectrometer with ddpCCD (Acton 785, Princeton Instrumentation Inc.). The laser excitation power for the  
27 tissue Raman collection is 65mW, and the exposure time of single spectrum is 5 second. The numerical  
28 aperture (NA) of Raman probe (1cm in diameter) is 0.22.

29  
30 **Molecular subgrouping status.** This study included 7 astrocytoma, 8 oligodendroglioma, and 29 GBM  
31 (including 2 molecular GBM) from Beijing Tiantan Hospital. The enrolled patients' data, including basic  
32 demographic information, imaging data, pathological diagnosis, and molecular characteristics, were collected  
33 from the hospital information system (HIS). The integrated diagnosis of tumors in this study relied on  
34 histological pathology and molecular features. The histological pathology of tumors was validated using the  
35 hematoxylin-eosin (H&E) stain of tumor tissue. The following key molecular features, which contribute to the  
36 integrated diagnosis of glioma, were determined using pyrosequencing and/or next-generation sequencing  
37 (NGS), including the mutation status of IDH1 and IDH2, MGMT promoter methylation status, 1p/19q co-  
38 deletion status, the mutation status of the TERT promoter, EGFR amplification status, gain of chromosome 7  
39 and loss of chromosome 10, and the homozygous deletion status of CDKN2A/B. According to the 2021  
40 WHO classification of tumors of the central nervous system, common diffuse gliomas in adults are divided  
41 into three types: astrocytoma, IDH-mutant; oligodendroglioma, IDH-mutant and 1p/19q co-deleted; and  
42 glioblastoma, IDH-wildtype. All IDH-mutant diffuse astrocytic tumors are considered as a single type  
43 (astrocytoma, IDH-mutant) and are graded as CNS WHO grade 2, 3, or 4. However, the presence of  
44 homozygous deletion of CDKN2A/B results in a CNS WHO grade of 4, even without typical histological  
45 features such as microvascular proliferation or necrosis. For IDH-wildtype diffuse gliomas in adults, if one or  
46 more of the three genetic parameters are present (TERT promoter mutation, EGFR gene amplification,  
47 combined gain of chromosome 7 and loss of chromosome 10), these lesions are assigned to the highest  
48 WHO grade, namely molecular GBM. Oligodendroglioma, IDH-mutant and 1p/19q co-deleted, are graded as  
49 CNS grade 2 or 3 based on histological features. Anaplastic oligodendroglioma is not included in this  
50 classification. Only in the context of an IDH-wildtype diffuse and astrocytic glioma in adults, if there are  
51 typical histological features (microvascular proliferation or necrosis) or key molecular characteristics (TERT  
52 promoter mutation or EGFR gene amplification or +7/-10 chromosome copy number changes), a diagnosis  
53 of glioblastoma, IDH-wildtype can be made.

54  
55 **Raman spectrum pre-process.** The original spectral data contains various noise and auto-fluorescence  
56 background; therefore, the spectra need to be processed before being input into the deep learning model.  
57 The pre-processing takes four steps: (1) wavenumber selection; (2) background subtraction; (3) smoothing;  
58 (4) normalization. In brief, the wavenumber between 400-1800 cm<sup>-1</sup> was selected as the region of interest.  
59 The asymmetric least-squares method was applied to subtract the background signal. The data were then  
60 smoothed by a Savitzky-Golay filter to reduce the noise and increase the signal-to-noise ratio. All the  
61 processing mentioned above was done by Python 3.7 library scipy 1.8.0.

1 **Raman spectrum classification model.** Using PCA, we assume that all meaningful information which  
2 contains within the variance. Through finding the maximum variance space, we could get principal  
3 components (PC1, PC2 etc.) of Raman shift with high variance. Using SVM, we create a hyper plane ( $\omega \cdot x -$   
4  $b=0$ ) with minimum distance between points. SVM method only focuses on class weight from extreme points,  
5 in the meanwhile ignoring distances between other points to hyper plane. Therefore, SVM may fit well with  
6 small sample size Raman spectrum data. Combining PCA and SVM, we built a machine learning based  
7 classification model for high-grade glioma subgrouping. All the processing mentioned above was done by  
8 Python 3.7 library sklearn 0.24.2.

9 Different with PCA, UMAP used nonlinear dimensional reduction, and find a representation (UMAP1, UMAP2  
10 etc.) of Raman data in low-dimensional space  $R^N$ . Firstly, a good map from Riemannian manifold  $M$  to  $R^N$   
11 was found. Then Raman data  $D$  is uniformly drawn from  $M$ . By simulating approximate distances in  $M$   
12 between points in  $D$  that are close enough in  $R^N$ , we finally get UMAP values in  $R^N$ . Here, we built supervised  
13 UMAP classification model for high-grade glioma subgrouping. All the processing mentioned above was  
14 done by Python 3.7 library UMAP-learn 0.5.3.

15 Structure of ResNet were described in the **Figure 2B**. Here we optimized the 1D ResNet networks for  
16 Raman data modeling using following strategies. (1) In order to achieve the capture of information at  
17 different scales, multi-layer convolution operations are used. (2) To simulate many different data patterns,  
18 nonlinear activation functions Tanh are used instead of *Linear* or *Relu*. (3) To achieve accurate optimization  
19 of hyper parameters of network, backpropagation and gradient descent are used to fit spectral wavenumber  
20 information. (4) The saliency map of deep learning models (ResNet) was simulated by the binary stochastic  
21 filtering (BSF) feature selection methods as shown in **Figure 2B**. All these optimization steps efficiently  
22 extract one-dimensional Raman spectral data information for binary subgrouping, and avoid model over-  
23 fitting. All the processing mentioned above was done by Python 3.7 Library keras 2.2.4 and tensorflow  
24 1.14.0.

25 **Model evaluation.** For subgrouping evaluation, true positives correspond to correct molecular subgrouping  
26 of Raman spectra from each tissue site compared with the ground truth of Glioma from the same tissue,  
27 false positives correspond to wrong subgrouping for instance (e.g., IDH wild), and false negatives  
28 correspond to wrong subgrouping for instance (e.g., IDH mutation). Outcomes of high-grade glioma Raman  
29 classification were evaluated with respect to sensitivity (SEN), specificity (SPC), and accuracy (ACC) as  
30 follows:

$$31 \quad \text{Sensitivity} = \frac{\text{True positive}}{\text{True positive} + \text{False negative}} \quad (1)$$

$$32 \quad \text{Specificity} = \frac{\text{True negative}}{\text{True negative} + \text{False positive}} \quad (2)$$

$$33 \quad \text{Accuracy} = \frac{\text{True negative} + \text{True positive}}{\text{True negative} + \text{True positive} + \text{False positive} + \text{False negative}} \quad (3)$$

34 The binary classification for glioma molecular subgrouping was evaluated with a binary receiver operating  
35 characteristic (ROC) analysis according to the method. A ROC curve was generated by continuously varying  
36 the threshold of the probability for each category based on the ground truth. The area under the ROC curve  
37 (AUC) ranging from 0 to 1 evaluates the ability of a model to accurately distinguish different glioma  
38 subgroups with maximum sensitivity and specificity.  
39

40

1 **Data availability and Code availability**

2 The main data supporting the findings of this study are available within the paper and its Supplementary  
3 Information. All the programs for research purposes are available upon reasonable request. The system  
4 control software and the data collection software are proprietary and used in licensed technologies.

5  
6 **Acknowledgements**

7 This work was supported by National Natural Science Foundation of China (No. 62027824, No. 91959120,  
8 and No. 62205010); Beijing Natural Science Foundation (No.7224367 and No. L223018); Fundamental  
9 Research Funds for the Central Universities (No. YWF-22-L-547 and No. YWF-22-L-1265).

10  
11 **Author contributions**

12 C.L. and J.W. contribute equally. X.C., N.J. and S.Y. designed the methodology. J.W. and N. J. provided  
13 glioma tumor specimens and RNA sequencing results. C.L. and J.W. performed experiments using Raman  
14 spectroscopy. C.L. and J.S. wrote data processing programs. X.C., S. Y. and N.J. supervised the project.,  
15 C.L., N.J., X. C. and S. Y. wrote the manuscript. All authors edited the manuscript.

16  
17 **Competing interests**

18 The authors declare no competing interests.

19

## 1 **References**

- 2 1. Lapointe, S., Perry, A. & Butowski, N. A. Primary brain tumours in adults. *The Lancet* **392**, 432–446  
3 (2018).
- 4 2. Stupp, R., Lukas, R. V. & Hegi, M. E. Improving survival in molecularly selected glioblastoma. *The*  
5 *Lancet* **393**, 615–617 (2019).
- 6 3. Brown, T. J. *et al.* Association of the Extent of Resection With Survival in Glioblastoma: A Systematic  
7 Review and Meta-analysis. *JAMA Oncol* **2**, 1460–1469 (2016).
- 8 4. Wijnenga, M. M. J. *et al.* The impact of surgery in molecularly defined low-grade glioma: an  
9 integrated clinical, radiological, and molecular analysis. *Neuro Oncol* **20**, 103–112 (2018).
- 10 5. Butterfield, J. T. *et al.* Racial disparities in recommendations for surgical resection of primary brain  
11 tumours: a registry-based cohort analysis. *The Lancet* **400**, 2063–2073 (2022).
- 12 6. Louis, D. N. *et al.* The 2021 WHO Classification of Tumors of the Central Nervous System: a  
13 summary. *Neuro Oncol* **23**, 1231–1251 (2021).
- 14 7. Kurian, K. M., Haynes, H. R., Crosby, C., Hopkins, K. & Williams, M. Isocitrate dehydrogenase  
15 mutation analysis in gliomas as a diagnostic and prognostic biomarker. *The Lancet* **381**, S61 (2013).
- 16 8. Wu, F. *et al.* Immunological profiles of human oligodendrogliomas define two distinct molecular  
17 subtypes. *eBioMedicine* **87**, (2023).
- 18 9. Schiff, D. Benefit with adjuvant chemotherapy in anaplastic astrocytoma. *The Lancet* **390**, 1625–  
19 1626 (2017).
- 20 10. Chaligne, R. *et al.* Epigenetic encoding, heritability and plasticity of glioma transcriptional cell states.  
21 *Nat Genet* **53**, 1469–1479 (2021).
- 22 11. Liu, I. *et al.* The landscape of tumor cell states and spatial organization in H3-K27M mutant diffuse  
23 midline glioma across age and location. *Nat Genet* **54**, 1881–1894 (2022).
- 24 12. Ochocka, N. *et al.* Single-cell RNA sequencing reveals functional heterogeneity of glioma-associated  
25 brain macrophages. *Nat Commun* **12**, 1151 (2021).
- 26 13. Tan, Y. *et al.* A radiomics nomogram may improve the prediction of IDH genotype for astrocytoma  
27 before surgery. *Eur Radiol* **29**, 3325–3337 (2019).
- 28 14. MacIver, C. L. *et al.* Filtration-Histogram Based Magnetic Resonance Texture Analysis (MRTA) for  
29 the Distinction of Primary Central Nervous System Lymphoma and Glioblastoma. *J Pers Med* **11**, 876 (2021).
- 30 15. Jiang, C. *et al.* Fusion Radiomics Features from Conventional MRI Predict MGMT Promoter  
31 Methylation Status in Lower Grade Gliomas. *Eur J Radiol* **121**, 108714 (2019).
- 32 16. Reinges, M. H. T. *et al.* Course of brain shift during microsurgical resection of supratentorial cerebral  
33 lesions: limits of conventional neuronavigation. *Acta Neurochir (Wien)* **146**, 369–377; discussion 377 (2004).
- 34 17. Ganser, K. A. *et al.* [Quantification of brain shift effects in MRI images]. *Biomed Tech (Berl)* **42**  
35 **Suppl**, 247–248 (1997).
- 36 18. Lu, C.-F. *et al.* Machine Learning-Based Radiomics for Molecular Subtyping of Gliomas. *Clin Cancer*  
37 *Res* **24**, 4429–4436 (2018).
- 38 19. Jermyn, M. *et al.* Intraoperative brain cancer detection with Raman spectroscopy in humans. *Sci*  
39 *Transl Med* **7**, 274ra19 (2015).



- 1 20. Huang, Z., Zeng, H., Hamzavi, I., McLean, D. I. & Lui, H. Rapid near-infrared Raman spectroscopy  
2 system for real-time in vivo skin measurements. *Opt Lett* **26**, 1782–1784 (2001).
- 3 21. Huang, Z. *et al.* Near-infrared Raman spectroscopy for optical diagnosis of lung cancer. *Int J Cancer*  
4 **107**, 1047–1052 (2003).
- 5 22. Bergholt, M. S. *et al.* In vivo diagnosis of esophageal cancer using image-guided Raman endoscopy  
6 and biomolecular modeling. *Technol Cancer Res Treat* **10**, 103–112 (2011).
- 7 23. Lin, K., Zheng, W., Lim, C. M. & Huang, Z. Real-time In vivo Diagnosis of Nasopharyngeal  
8 Carcinoma Using Rapid Fiber-Optic Raman Spectroscopy. *Theranostics* **7**, 3517–3526 (2017).
- 9 24. Shu, C., Zheng, W., Lin, K., Lim, C. & Huang, Z. Label-Free Follow-Up Surveying of Post-Treatment  
10 Efficacy and Recurrence in Nasopharyngeal Carcinoma Patients with Fiberoptic Raman Endoscopy. *Anal.*  
11 *Chem.* **93**, 2053–2061 (2021).
- 12 25. Shu, C. *et al.* Deep Learning-Guided Fiberoptic Raman Spectroscopy Enables Real-Time In Vivo  
13 Diagnosis and Assessment of Nasopharyngeal Carcinoma and Post-treatment Efficacy during Endoscopy.  
14 *Anal. Chem.* **93**, 10898–10906 (2021).
- 15 26. Žuvela, P. *et al.* Fiber-Optic Raman Spectroscopy with Nature-Inspired Genetic Algorithms  
16 Enhances Real-Time in Vivo Detection and Diagnosis of Nasopharyngeal Carcinoma. *Anal. Chem.* **91**,  
17 8101–8108 (2019).
- 18 27. Livermore, L. J. *et al.* Raman spectroscopy to differentiate between fresh tissue samples of glioma  
19 and normal brain: a comparison with 5-ALA-induced fluorescence-guided surgery. *J Neurosurg* 1–11 (2020)  
20 doi:10.3171/2020.5.JNS20376.
- 21 28. Riva, M. *et al.* Glioma biopsies Classification Using Raman Spectroscopy and Machine Learning  
22 Models on Fresh Tissue Samples. *Cancers (Basel)* **13**, 1073 (2021).
- 23 29. Galli, R. *et al.* Rapid Label-Free Analysis of Brain Tumor Biopsies by Near Infrared Raman and  
24 Fluorescence Spectroscopy—A Study of 209 Patients. *Front Oncol* **9**, 1165 (2019).
- 25 30. Uckermann, O. *et al.* IDH1 mutation in human glioma induces chemical alterations that are  
26 amenable to optical Raman spectroscopy. *J Neurooncol* **139**, 261–268 (2018).
- 27 31. Sciortino, T. *et al.* Raman Spectroscopy and Machine Learning for IDH Genotyping of Unprocessed  
28 Glioma Biopsies. *Cancers* **13**, 4196 (2021).
- 29 32. Livermore, L. J. *et al.* Rapid intraoperative molecular genetic classification of gliomas using Raman  
30 spectroscopy. *Neurooncol Adv* **1**, vdz008 (2019).
- 31 33. Hollon, T. *et al.* Artificial-intelligence-based molecular classification of diffuse gliomas using rapid,  
32 label-free optical imaging. *Nat Med* **29**, 828–832 (2023).
- 33 34. Trelin, A. & Prochazka, A. Binary Stochastic Filtering: a Method for Neural Network Size  
34 Minimization and Supervised Feature Selection. Preprint at <https://doi.org/10.48550/arXiv.1902.04510>  
35 (2019).
- 36 35. Bauchle, C. J. *et al.* Mitochondrial Efflux of Citrate and Isocitrate Is Fully Dispensable for Glucose-  
37 Stimulated Insulin Secretion and Pancreatic Islet  $\beta$ -Cell Function. *Diabetes* **70**, 1717–1728 (2021).
- 38 36. Ye, J. *et al.* IDH1 deficiency attenuates gluconeogenesis in mouse liver by impairing amino acid  
39 utilization. *Proc. Natl. Acad. Sci. U.S.A.* **114**, 292–297 (2017).
- 40 37. Drexler, R. *et al.* DNA methylation subclasses predict the benefit from gross total tumor resection in  
41 IDH-wildtype glioblastoma patients. *Neuro Oncol* **25**, 315–325 (2023).

- 1 38. Hervey-Jumper, S. L. *et al.* Interactive Effects of Molecular, Therapeutic, and Patient Factors on  
2 Outcome of Diffuse Low-Grade Glioma. *J Clin Oncol* **41**, 2029–2042 (2023).
- 3 39. Vanderbeek, A. M. *et al.* The clinical trials landscape for glioblastoma: is it adequate to develop new  
4 treatments? *Neuro Oncol* **20**, 1034–1043 (2018).
- 5 40. Regelsberger, J., Lohmann, F., Helmke, K. & Westphal, M. Ultrasound-guided surgery of deep  
6 seated brain lesions. *European Journal of Ultrasound* **12**, 115–121 (2000).
- 7 41. Böhlinger, H. J. *et al.* Imaging of human brain tumor tissue by near-infrared laser coherence  
8 tomography. *Acta Neurochir (Wien)* **151**, 507–517; discussion 517 (2009).
- 9 42. Sanai, N. *et al.* Intraoperative confocal microscopy in the visualization of 5-aminolevulinic acid  
10 fluorescence in low-grade gliomas. *J Neurosurg* **115**, 740–748 (2011).
- 11 43. Desroches, J. *et al.* A new method using Raman spectroscopy for in vivo targeted brain cancer  
12 tissue biopsy. *Sci Rep* **8**, 1792 (2018).
- 13 44. Desroches, J. *et al.* Development and first in-human use of a Raman spectroscopy guidance system  
14 integrated with a brain biopsy needle. *Journal of Biophotonics* **12**, e201800396 (2019).

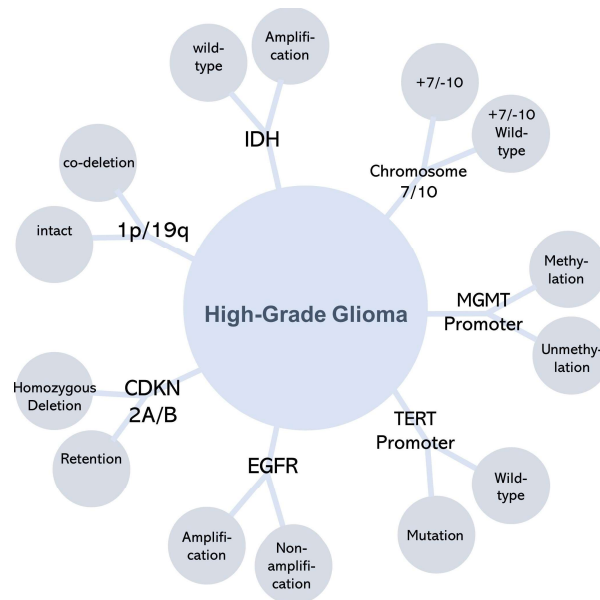

1  
2  
3  
4  
5  
6  
7  
8  
9

**Fig. 1 | Workflow of high-grade glioma molecular subgrouping classification.** According to 2021 WHO classification system, 7 typical molecular subgroups (IDH, 1p/19q, MGMT, TERT, EGFR, Chromosome7/10, CDKN2A/2B) were selected. First, high-grade glioma was classified for IDH and 1p/19q subgroups, and GBM was identified from high-grade glioma. Then, Raman of high-level glioma and GBM were classified for 7 molecular subgroups (MGMT methylation etc.).

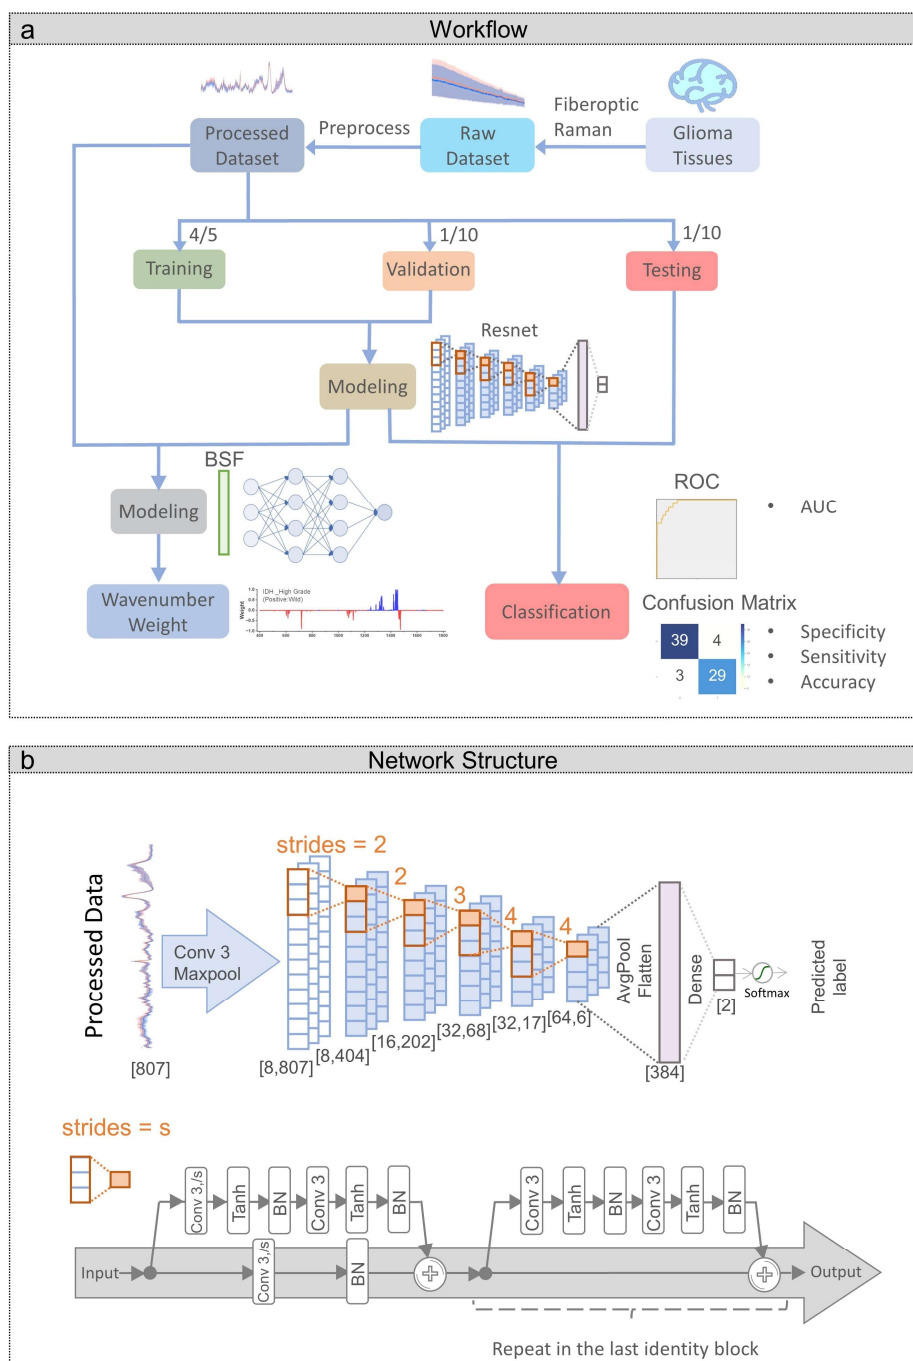

1  
2  
3  
4  
5  
6  
7  
8  
9  
10

**Fig. 2] Workflow of each subgrouping classification. a,** Workflow of each subgrouping modeling: the dataset preparing, Resnet model training for classification and BSF model training for weighing wavenumber contribution. **b,** Structure of the Resnet model designed. The numbers in bracket represent the size [(channels,) length] of the hidden layers. The orange numbers represent the strides of the first convolution layer in each identity block (orange dash line). Abbreviation: Conv: convolution layer with kernel size = 3 and strides = s, BN: batch normalization.

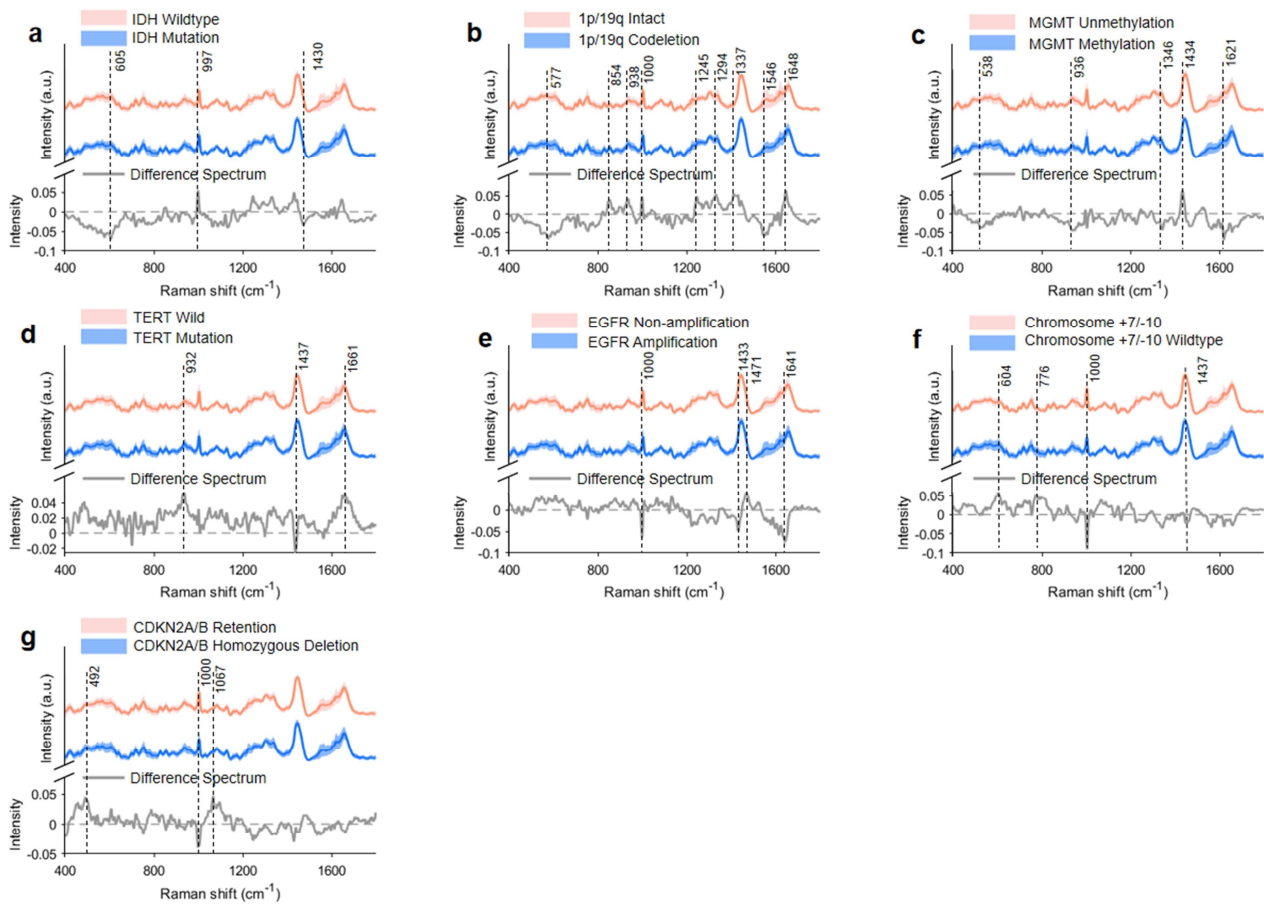

**Fig. 3| Mean FP Raman spectra of high-grade glioma molecular subgrouping for classification**

**acquired from 743 tissue sites of 44 patients under Raman spectroscopy. a,** Tissue Raman spectral differences between IDH wild and mutation (wild:442; mutation: 301). **b,** 1p/19q intact and codeletion tissues (intact: 593; codeletion: 150). **c,** MGMT unmethylation and methylation tissues (methylation: 546; unmethylation: 197). **d,** TERT wildtype and mutation tissues (mutation: 508; wildtype: 235). **e,** EGFR non-amplification and amplification tissues (amplification: 241; non-amplification: 502). **f,** Gain of chromosome 7 & loss of chromosome 10 and wild-type (+7/-10: 192; wild-type: 551). **g,** CDKN2A/B homozygous deletion and retention (homozygous deletion: 226; retention: 517).

1  
2  
3  
4  
5  
6  
7  
8  
9  
10  
11  
12

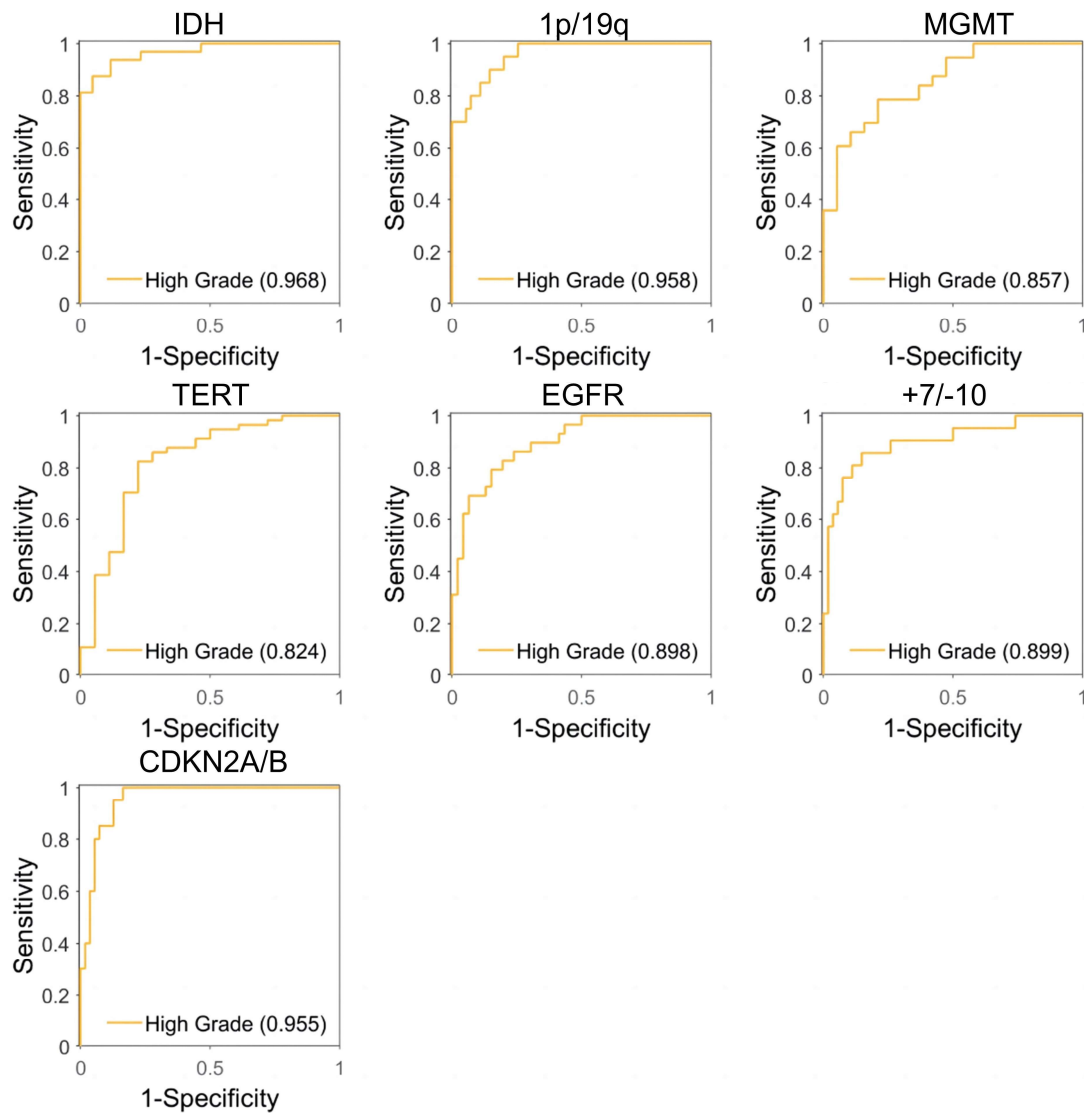

1  
2  
3  
4  
5  
6  
7  
8

**Fig. 4| Comparisons of Raman diagnostic ROC using deep learning (ResNet) model. 7 molecular subgroups of high-grade glioma (a, IDH, b, 1p/19q, c, MGMT, d, TERT, e, EGFR, f, Chromosome7/10, g, CDKN2A/B) and 5 molecular subgroups of GBM (MGMT, TERT, EGFR, Chromosome7/10, CDKN2A and CDKN2B).**

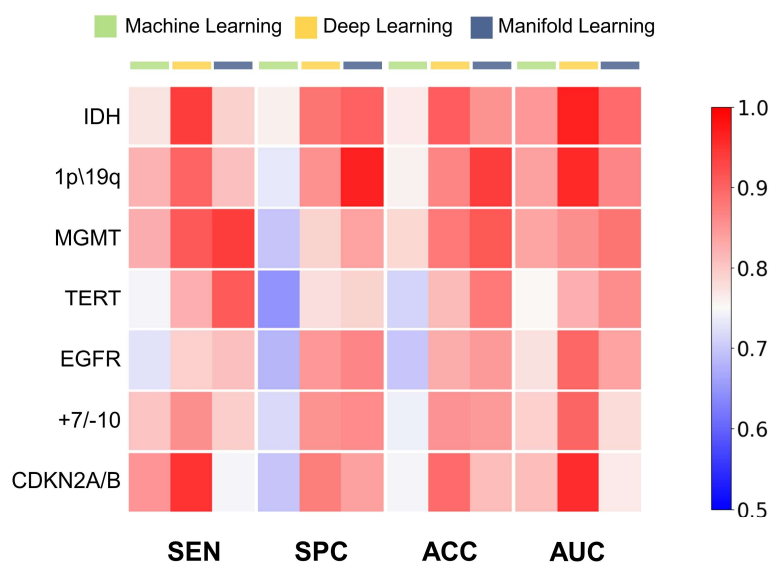

1  
2 **Fig. 5| Heatmap of Raman diagnostic performance.** For instance, sensitivity, specificity, accuracy and  
3 AUC of machine learning (SVM), manifold learning (UMAP), and deep learning (ResNet) models using  
4 Raman spectral datasets for separating high-grade glioma 7 molecular subgroups. SEN: sensitivity, SPC:  
5 specificity, ACC: accuracy, AUC: area under classification.  
6  
7  
8

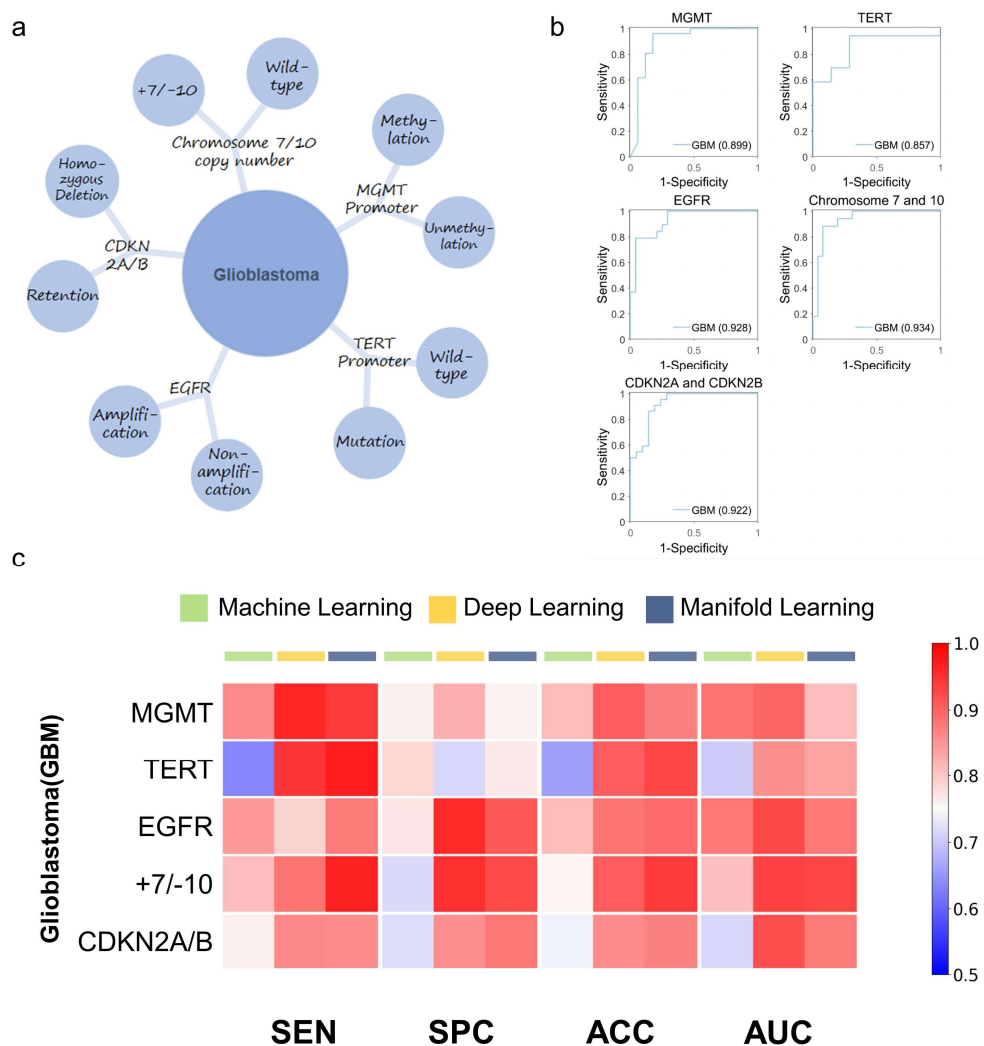

1  
2  
3  
4  
5  
6  
7  
8  
9

**Fig. 6| Classification performance in GBM 5 molecular subgroups. a**, 5 typical molecular subgroups selected in GBM. **b**, Raman diagnostic ROC using deep learning (ResNet) model. **c**, Heatmap of Raman diagnostic sensitivity, specificity, accuracy and AUC of machine learning (SVM), manifold learning (UMAP), and deep learning (ResNet) models using Raman spectral datasets for separating GBM 5 molecular subgroups. SEN: sensitivity, SPC: specificity, ACC: accuracy, AUC: area under classification.



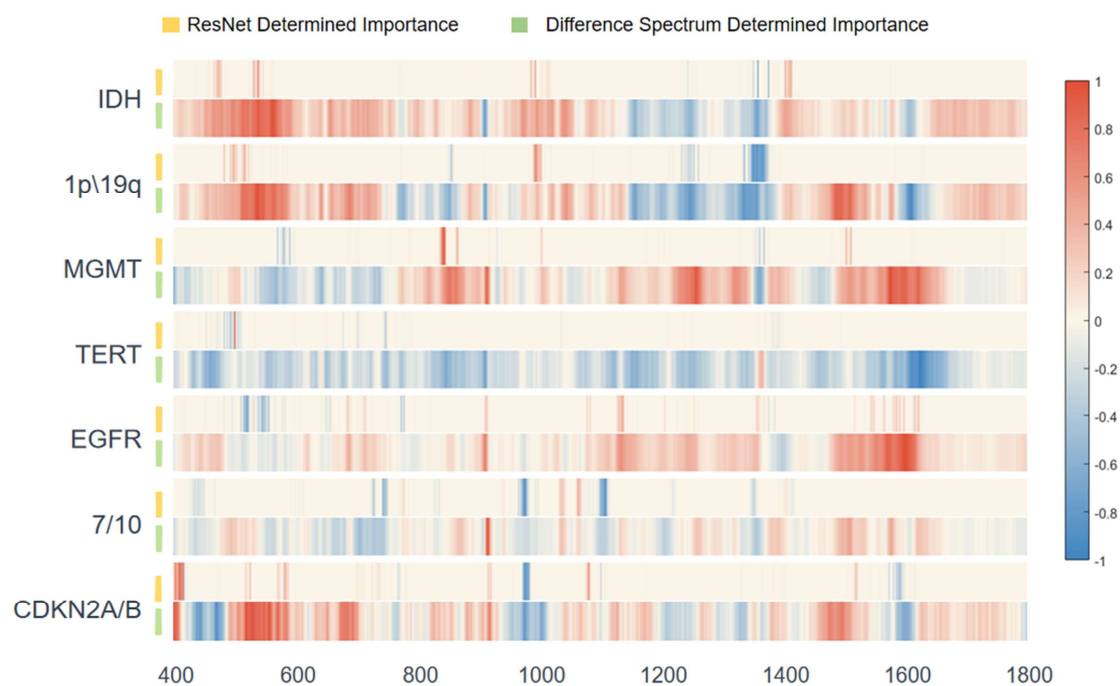

1  
2 **Fig. 7| Saliency maps in ResNet model for Raman shift signatures.** Discriminating high-grade glioma 7  
3 molecular subgroups (IDH, 1p/19q, MGMT, TERT, EGFR, Chromosome7/10, CDKN2A/B) correlates the  
4 Raman shift of biomolecular subgroups, normalized with max values of difference spectrum.  
5
